# Supplementary material for: Efficient inverse CO2/C2H2 separation driven by difference in rare thermodynamic affinities in a porous MOF
Source: Royal Society of Chemistry journal article supplement (doi:10.1039/d4qi02531h), 2024-11-30
Supplement: d4qi02531h1.pdf [file d4qi02531h1.pdf]

## *Supporting Information*

### **Efficient inverse CO<sub>2</sub>/C<sub>2</sub>H<sub>2</sub> separation driven by rare thermodynamic affinities difference in a porous MOF**

Hai-Yu Duan<sup>a</sup>, Xiu-Yuan Li<sup>\*a</sup>, Lei Hou<sup>\*b</sup>, Si-Ru Liu<sup>a</sup>, Xiang-Yu Liu<sup>\*c</sup>, Ping Wang<sup>\*a</sup>

<sup>a</sup>Shaanxi Key Laboratory of Optoelectronic Functional Materials and Devices, School of Materials Science and Chemical Engineering, Xi'an Technological University, Xi'an, 710021, P. R. China. E-mail: lixiuyuan@xatu.edu.cn, wping0922@163.com

<sup>b</sup>Key Laboratory of Synthetic and Natural Functional Molecule Chemistry of the Ministry of Education, Shaanxi Key Laboratory of Physico-Inorganic Chemistry, College of Chemistry & Materials Science, Northwest University, Xi'an 710069, P. R. China. E-mail: lhou2009@nwu.edu.cn

<sup>c</sup>State Key Laboratory of High-efficiency Coal Utilization and Green Chemical Engineering, College of Chemistry and Chemical Engineering, Ningxia University, Yinchuan 750021, P. R. China. E-mail: xiangyuli432@126.com

**Table S1** Summary of adsorption uptakes,  $Q_{st}$  values and selectivity of equimolar  $CO_2/C_2H_2$  mixture for reported  $CO_2$ -selective MOFs.

| MOFs                     | Uptake of $CO_2/C_2H_2$ @273K, 100 kPa ( $cm^3 g^{-1}$ ) | Uptake of $CO_2/C_2H_2$ @298K, 100 kPa ( $cm^3 g^{-1}$ ) | $Q_{st}$ of $CO_2/C_2H_2$ ( $kJ mol^{-1}$ ) | Selectivity       | Selectivity Conditions | Ref. |
|--------------------------|----------------------------------------------------------|----------------------------------------------------------|---------------------------------------------|-------------------|------------------------|------|
| [Co(HL <sup>dc</sup> )]  | 108/-                                                    | 239.5 <sup>e</sup> /140 <sup>e</sup>                     | \                                           | \                 | \                      | 1    |
| [Mn(bdc)(dpe)]           | 46.8 <sup>a</sup> /7.3 <sup>a</sup>                      | \                                                        | 29–30/28                                    | 8.8               | 273 K,<br>100 kPa      | 2    |
| SIFSIX-3-Ni              | \                                                        | 2.7 <sup>c</sup> /3.3 <sup>c</sup>                       | 50.9/36.7                                   | 7.7 <sup>j</sup>  | 298 K,<br>1 bar        | 3    |
| CD-MOF-1                 | \                                                        | 2.87 <sup>c</sup> /2.23 <sup>c</sup>                     | 41.0/17.6                                   | 6.6 <sup>j</sup>  | 298 K,<br>100 kPa      | 4    |
| CD-MOF-2                 | \                                                        | 2.67 <sup>c</sup> /2.03 <sup>c</sup>                     | 67.2/25.8                                   | 16.0 <sup>j</sup> | 298 K,<br>100 kPa      | 4    |
| Tm-MOF                   | 146.3/63.0                                               | 130.6/47                                                 | 45.2/17.8                                   | 17.5 <sup>j</sup> | 298 K,<br>1 bar        | 5    |
| MUF-16                   | \                                                        | 47.78 <sup>f</sup> /3.99 <sup>f</sup>                    | 32.3/-                                      | 510               | 293 K,<br>1 bar        | 6    |
| MUF-16(Ni)               | \                                                        | 47.97 <sup>f</sup> /7.53 <sup>f</sup>                    | 37.3/-                                      | 46                | 293 K,<br>1 bar        | 6    |
| MUF-16(Mn)               | \                                                        | 50.5 <sup>f</sup> /9.69 <sup>f</sup>                     | 36.6/-                                      | 31                | 293 K,<br>1 bar        | 6    |
| Cd-NP                    | \                                                        | 58.0/9.7                                                 | 27.7/-                                      | 85                | 298 K,<br>1 bar        | 7    |
| PCP-NH <sub>2</sub> -ipa | \                                                        | 72/43                                                    | 36.6/26.8                                   | 6.4               | 298 K,<br>1 bar        | 8    |
| PCP-NH <sub>2</sub> -bdc | \                                                        | 68/43                                                    | 34.57/25.6                                  | 4.4               | 298 K,<br>1 bar        | 8    |

|                                                                     |                                       |                                       |             |                  |                   |    |
|---------------------------------------------------------------------|---------------------------------------|---------------------------------------|-------------|------------------|-------------------|----|
| Ce(IV)-MIL-140-4F                                                   | 151.7 <sup>b</sup> /53.5 <sup>b</sup> | 110.3 <sup>b</sup> /41.5 <sup>b</sup> | 39.5/27.4   | 9.5 <sup>i</sup> | 298 K,<br>100 kPa | 9  |
| PMOF-1                                                              | 47.5/9.5                              | \                                     | \           | \                | \                 | 10 |
| [Zn(atz)(BDC-Cl <sub>4</sub> ) <sub>0.5</sub> ] <sub>n</sub>        | 60.2 <sup>b</sup> /-                  | 19.7 <sup>b</sup> /-                  | 32.7/25.4   | 2.4              | 285 K,<br>100 kPa | 11 |
| Cu-F-pymo                                                           | \                                     | 1.19 <sup>c</sup> /0.10 <sup>c</sup>  | 28.8/-      | >10 <sup>5</sup> | 298 K,<br>100 kPa | 12 |
| [Cu(hfipbb)(H <sub>2</sub> hfipbb) <sub>0.5</sub> ]                 | 0.75 <sup>c</sup> /0.03 <sup>c</sup>  | 0.74 <sup>c</sup> /0.10 <sup>c</sup>  | 25.5/-      | 696              | 298 K,<br>1 bar   | 13 |
| SU-101(Bi)                                                          | \                                     | 53.7/51.4                             | 30.5/28.8   | 5.5              | 298 K,<br>100kPa  | 14 |
| SU-101(Al)                                                          | \                                     | 53.1/-                                | 31.3/-      | 15.5             | 298 K,<br>100 kPa | 14 |
| SU-101(In)                                                          | \                                     | 55.0/-                                | 28.3/-      | 6.2              | 298 K,<br>100 kPa | 14 |
| SU-101(Ga)                                                          | \                                     | 40.2/-                                | 27.7/-      | 11.1             | 298 K,<br>100 kPa | 14 |
| [Zn(odip) <sub>0.5</sub> (bpe) <sub>0.5</sub> (CH <sub>3</sub> OH)] | 118.8/59.0                            | 118.7/39.8                            | 42.3/35.0   | 13.2             | 298 K,<br>100 kPa | 15 |
| ZU-610a                                                             | \                                     | 1.51 <sup>c</sup> /0.12 <sup>c</sup>  | 27.3/-      | 207              | 298 K,<br>100 kPa | 16 |
| Y-bptc                                                              | \                                     | 55/-                                  | 31.5/-      | 4.1              | 298 K,<br>1bar    | 17 |
| SNNU-334                                                            | 85.1/66.8                             | \                                     | 20.2/38.3   | 3595.4           | 273 K,<br>1atm    | 18 |
| SNNU-335                                                            | 78.4/63.0                             | \                                     | 38.07/44.23 | \                | \                 | 18 |
| SNNU-336                                                            | 92.7/65.3                             | \                                     | 50.9/48.7   | \                | \                 | 18 |

|                        |                                    |                                       |             |                     |                        |    |
|------------------------|------------------------------------|---------------------------------------|-------------|---------------------|------------------------|----|
| MOF-808-ARG<br>(dry)   | \                                  | 51.0/41.3                             | 48.3/38.8   | 3.5 <sup>j</sup>    | 298 K,<br>1 bar        | 19 |
| MOF-808-ARG<br>(wet)   | \                                  | 71.0/7.8                              | 70.3/5.2    | 71 <sup>j</sup>     | 298 K,<br>1 bar        | 19 |
| Bi-MOF-CHO             | \                                  | 147.7 <sup>b</sup> /81.8 <sup>b</sup> | 48.2/46.2   | 7.7                 | 298 K,<br>100 kPa      | 20 |
| Bi-MOF-<br>COOH        | \                                  | 114.7 <sup>b</sup> /-                 | 43.6/40.6   | 5.3                 | 298 K,<br>100 kPa      | 20 |
| Bi-MOF-NO <sub>2</sub> | \                                  | 129.1 <sup>b</sup> /-                 | 38.8/38.5   | 4.9                 | 298 K,<br>100 kPa      | 20 |
| BUCT-C19               | \                                  | 40.3/6.7                              | \           | 10700               | 298 K,<br>100 kPa      | 21 |
| F4_MIL-<br>140A(Ce)    | \                                  | 2.6 <sup>c</sup> /-                   | 35-45/-     | \                   | \                      | 22 |
| MFU-4                  | \                                  | 3.17 <sup>c</sup> g/-                 | 24/-        | 3360                | 300 K,<br>1bar         | 23 |
| Zn-DPNA                | 61.1/92.1                          | 52.7/-                                | 43.1/32.4   | 11.9                | 298 K, low<br>pressure | 24 |
| ALF                    | \                                  | 86.2/3.3                              | \           | 6.5×10 <sup>5</sup> | 298 K,<br>100 kPa      | 25 |
| NKMOF-9a               | 57.5/4.9                           | 46.4/2.8                              | 69.6/-      | 241.9               | 298 K,<br>1 bar        | 26 |
| Zn-ox-mtz              | \                                  | 68.78/5.46                            | 43.02/-     | 1064.9              | 298 K,<br>1.0 bar      | 27 |
| Zn-ox-trz              | \                                  | 89.49/67.85                           | 38.09/38.39 | 1.9                 | 298 K,<br>1.0 bar      | 27 |
| Co-CUK-1               | 170 <sup>d</sup> /119 <sup>d</sup> | 106/86                                | 20.8/-      | 2                   | 298 K,<br>100 kPa      | 28 |
| Ni-CUK-1               | 142 <sup>d</sup> /97 <sup>d</sup>  | \                                     | 21.7/-      | 2                   | 298 K,<br>100 kPa      | 28 |

|                     |                                   |                                      |                       |      |                   |              |
|---------------------|-----------------------------------|--------------------------------------|-----------------------|------|-------------------|--------------|
| Mg-CUK-1            | 144 <sup>d</sup> /89 <sup>d</sup> | \                                    | \                     | 2    | 298 K,<br>100 kPa | 28           |
| HOF-FJU-88          | \                                 | 59.6 <sup>h</sup> /6.28 <sup>h</sup> | 12.3/-                | 1894 | 296 K,<br>1 bar   | 29           |
| Cu(Qc) <sub>2</sub> | \                                 | 66.6 <sup>b</sup> /26.5 <sup>b</sup> | 31.7±3.5/<br>21.4±3.5 | 5.6  | 298 K,<br>1 bar   | 30           |
| 1                   | 74.6/45.5                         | 57.0/37.9                            | 38.7/29.0             | 3.0  | 298 K,<br>100 kPa | This<br>work |

<sup>a</sup> at 273 K, 91 kPa;

<sup>b</sup> gas uptake (cm<sup>3</sup> cm<sup>-3</sup>);

<sup>c</sup> gas uptake (mmol g<sup>-1</sup>);

the gas uptakes of CO<sub>2</sub> and/or C<sub>2</sub>H<sub>2</sub> <sup>d</sup> at 233 K, <sup>e</sup> at 195 K, <sup>f</sup> at 293 K, <sup>g</sup> at 300 K, <sup>h</sup> at 296 K, <sup>i</sup> at 298 K and 5 bar;

<sup>j</sup> the mixture of CO<sub>2</sub>/C<sub>2</sub>H<sub>2</sub> (1:2, v:v).

**Table S2** Structures data and selected refinement of **1**.

| Complex                    | <b>1</b>                                                         |
|----------------------------|------------------------------------------------------------------|
| Molecular Formula          | C <sub>20</sub> H <sub>19</sub> Ca <sub>2</sub> NO <sub>12</sub> |
| Formula Weight             | 545.52                                                           |
| Temperature (K)            | 293(2) K                                                         |
| Crystal System             | Triclinic                                                        |
| Space Group                | $P\bar{1}$                                                       |
| <i>a</i> (Å)               | 10.2890(4)                                                       |
| <i>b</i> (Å)               | 11.6704(6)                                                       |
| <i>c</i> (Å)               | 12.4006(10)                                                      |
| $\alpha$ (°)               | 71.553(6)                                                        |
| $\beta$ (°)                | 66.005(6)                                                        |
| $\gamma$ (°)               | 68.890(4)                                                        |
| <i>V</i> (Å <sup>3</sup> ) | 1243.56(15)                                                      |

|                          |        |
|--------------------------|--------|
| Z                        | 2      |
| Dc (g·cm <sup>-3</sup> ) | 1.457  |
| F(000)                   | 564    |
| Reflections collected    | 10350  |
| Goodness-of-fit on $F^2$ | 1.049  |
| $R_1^a[I > 2\sigma(I)]$  | 0.0760 |
| $wR_2^b[I > 2\sigma(I)]$ | 0.2188 |

$$^aR_1 = \frac{\sum ||F_o| - |F_c||}{\sum |F_o|}, \quad ^b wR_2 = \left[ \frac{\sum w(F_o^2 - F_c^2)^2}{\sum w(F_o^2)^2} \right]^{1/2}$$

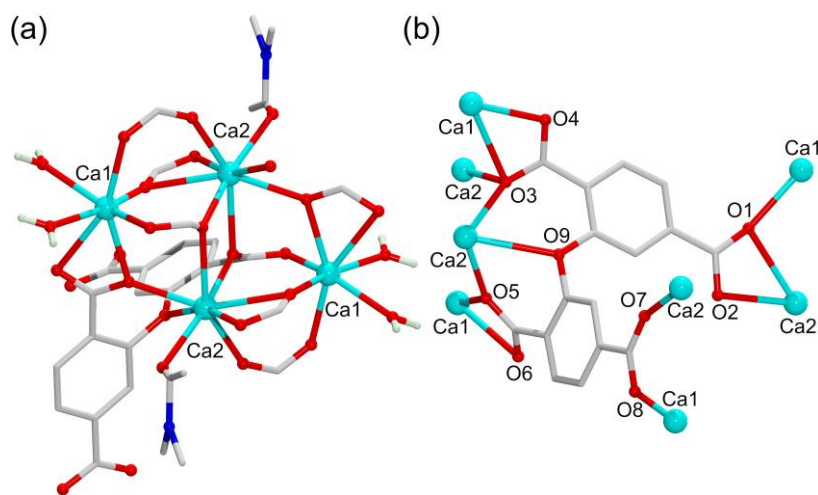

**Fig. S1** (a) Coordination environment of Ca<sup>2+</sup> ion; (b) Coordination mode of H<sub>4</sub>odp.

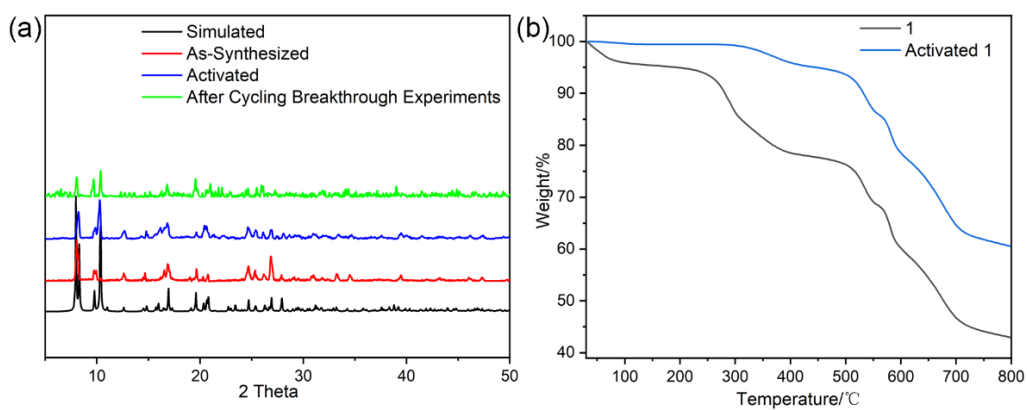

**Fig. S2** PXRD and TGA patterns.

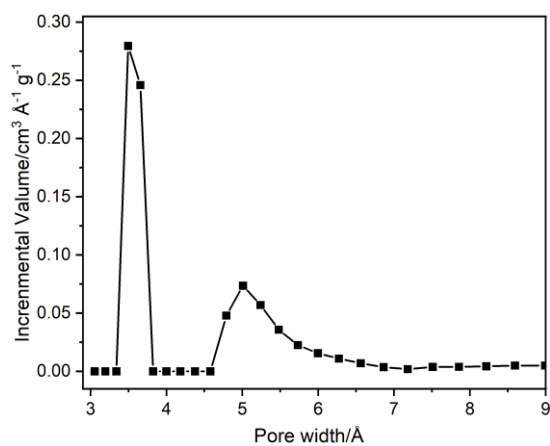

**Fig. S3** The pore size distributions obtained by the non-local density-functional theory (NLDFT) model from CO<sub>2</sub> at 273 K.

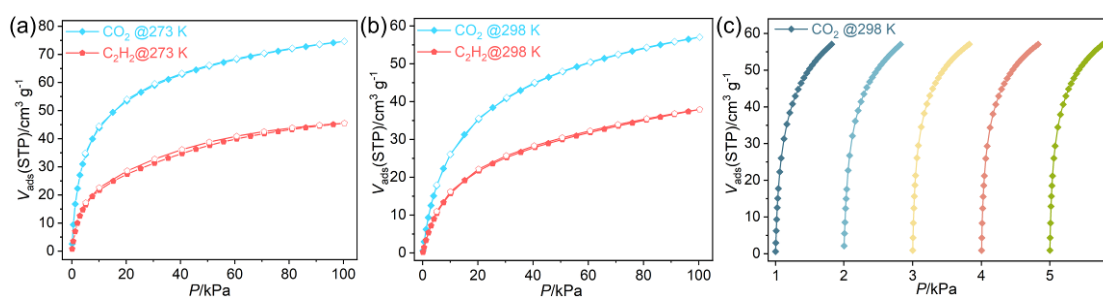

**Fig. S4** Gas sorption isotherms (units: cm<sup>3</sup> g<sup>-1</sup>) for CO<sub>2</sub> and C<sub>2</sub>H<sub>2</sub> at (a) 273 K and (b) 298 K; (c) Cyclic CO<sub>2</sub> sorption isotherms at 298 K.

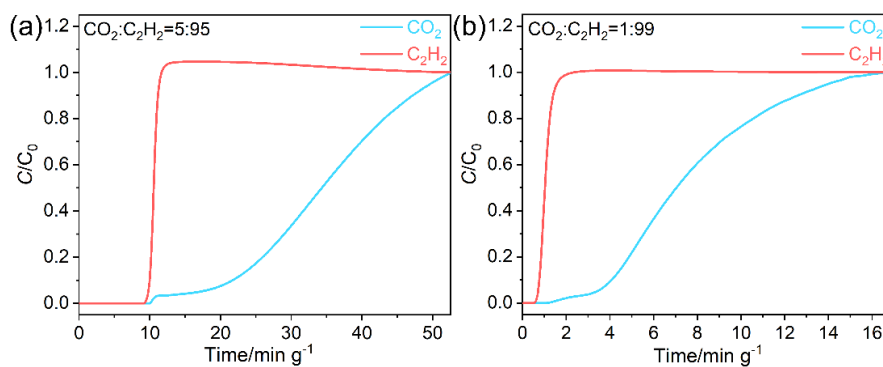

**Fig. S5** Breakthrough curves for (a) 5/95 and (b) 1/99 CO<sub>2</sub>/C<sub>2</sub>H<sub>2</sub> mixtures.

### Calculation of Sorption Heat using Virial 2 Model

$$\ln P = \ln N + 1/T \sum_{i=0}^m a_i N^i + \sum_{i=0}^n b_i N^i \quad Q_{st} = -R \sum_{i=0}^m a_i N^i$$

The above virial expression was used to fit the combined isotherm data for three frameworks at 273 and 298 K, where  $P$  is the pressure,  $N$  is the adsorbed amount,  $T$  is the temperature,  $a_i$  and  $b_i$  are virial coefficients, and  $m$  and  $n$  are the number of coefficients used to describe the isotherms.  $Q_{st}$  is the coverage-dependent enthalpy of adsorption and  $R$  is the universal gas constant.

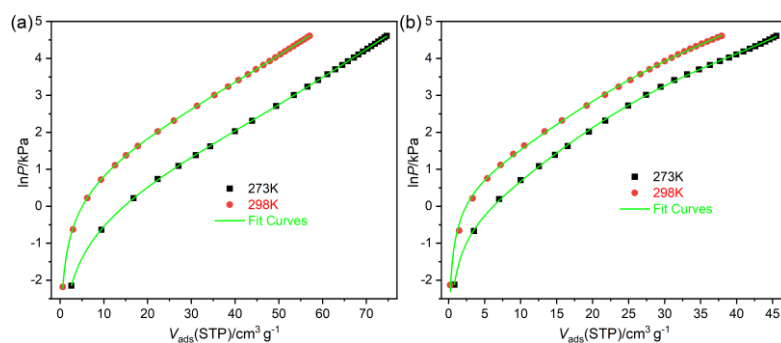

**Fig. S6** (a) CO<sub>2</sub> and (b) C<sub>2</sub>H<sub>2</sub> adsorption isotherms of **1a** with fitting by Virial 2 model.

**Table S3** Parameters obtained from the Virial 2 model fitting of the single-component adsorption isotherms of CO<sub>2</sub> and C<sub>2</sub>H<sub>2</sub> at 273 K and 298 K.

|                               | a0       | a1      | a2       | a3        | a4       | a5        | b0      | b1       | b2      | b3        | Chi <sup>2</sup> | R <sup>2</sup> |
|-------------------------------|----------|---------|----------|-----------|----------|-----------|---------|----------|---------|-----------|------------------|----------------|
| CO <sub>2</sub>               | -4678.02 | 34.6279 | -0.7279  | -1.80E-04 | 9.81E-05 | -5.12E-07 | 13.9894 | -0.10383 | 0.00352 | -2.30E-05 | 1.12E-04         | 1              |
| C <sub>2</sub> H <sub>2</sub> | -3505.79 | 82.8451 | -0.59184 | -0.04199  | 7.24E-04 | -2.06E-06 | 10.9831 | -0.33925 | 0.01012 | -8.08E-05 | 2.08E-03         | 0.999          |



## CO<sub>2</sub>/C<sub>2</sub>H<sub>2</sub> Mixtures Selectivity Prediction via IAST

The experimental isotherm data for pure CO<sub>2</sub> and C<sub>2</sub>H<sub>2</sub> were fitted using a dual Langmuir-Freundlich (L-F) model:

$$q = \frac{a_1 * b_1 * p^{c_1}}{1 + b_1 * p^{c_1}} + \frac{a_2 * b_2 * p^{c_2}}{1 + b_2 * p^{c_2}}$$

Where  $q$  and  $p$  are adsorbed amounts and the pressure of component  $i$ , respectively.

The adsorption selectivities for binary mixtures defined by

$$S_{i/j} = \frac{x_i * y_j}{x_j * y_i}$$

were respectively calculated using IAST. Where  $x_i$  is the mole fraction of component  $i$  in the adsorbed phase and  $y_i$  is the mole fraction of component  $i$  in the bulk.

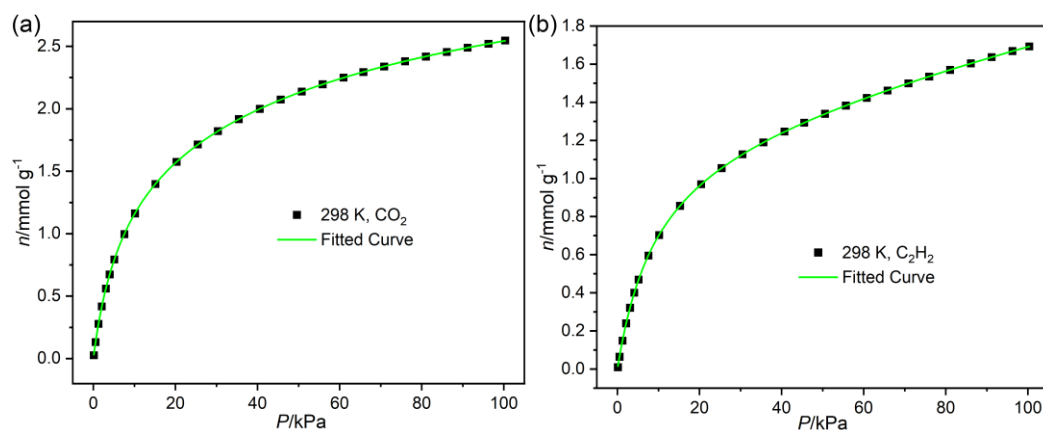

**Fig. S7** Adsorption isotherms of **1a** fitting by dual L-F model.

**Table S4** Parameters obtained from the dual Langmuir-Freundlich fitting of the single-component adsorption isotherms.

| 298 K                         | a1      | b1      | c1      | a2      | b2      | c2      | Chi <sup>2</sup> | R <sup>2</sup> |
|-------------------------------|---------|---------|---------|---------|---------|---------|------------------|----------------|
| CO <sub>2</sub>               | 1.52099 | 0.14252 | 0.99064 | 2.17614 | 0.01862 | 0.8798  | 1.99E-06         | 1              |
| C <sub>2</sub> H <sub>2</sub> | 1.18319 | 0.10654 | 1.01937 | 8.03444 | 0.00109 | 0.93587 | 2.26E-06         | 1              |

## Separation Potential Calculation

The separation potential ( $\Delta q$ ) is a combined metric, which incorporates both uptake capacity and selectivity, which is defined to evaluate the separation performances in fixed bed adsorbers for gas mixture. The separation potential  $\Delta q$ , is calculated from IAST base on the following equation:

$$\Delta q = q_1 \frac{y_2}{y_1} - q_2$$

Where  $y_1$  and  $y_2$  are the mole fractions of the  $\text{CO}_2$  and  $\text{C}_2\text{H}_2$  in the  $\text{CO}_2/\text{C}_2\text{H}_2$  mixture gases, respectively.  $q_1$  and  $q_2$  are  $\text{CO}_2$  and  $\text{C}_2\text{H}_2$  uptake in the gas mixture, respectively, and predicted by the IAST theory. The physical significance of  $\Delta q$  is that it represents the maximum amount of pure  $\text{C}_2\text{H}_2$  that can be obtained during the adsorption phase of fixed bed separations.

## Calculation of Breakthrough Experiments

The calculation method of the  $\text{C}_2\text{H}_2$  purity is as follows:

$$c = \frac{q_{\text{C}_2\text{H}_2}}{q_{\text{C}_2\text{H}_2} + q_{\text{CO}_2}}$$

The gas breakthrough gas amount ( $q_i$ ) ( $\text{mmol g}^{-1}$ ) was calculated by integrating the breakthrough curve  $F_i(t)$  as following equation:

$$q_i = \frac{f_i \int_0^{t_1} F_i(t) dt}{22.4 \times m}$$

Where the  $m$  represents the adsorbent mass,  $f_i$  is the flow rate of gas  $i$  ( $\text{mL min}^{-1}$ );  $F_i(t)$  is the function of the breakthrough curve of component  $i$ .

## Simulation Methodology

Grand canonical Monte Carlo (GCMC) simulations were performed for evaluating the gas adsorption performance. The partial charges of atoms in the framework were originated from the QEq method.<sup>31</sup> The supercell of  $3 \times 3 \times 3$  was used during the simulation. All the parameters for atoms of **1a** were modeled with the Dreiding forcefield.<sup>32</sup>  $\text{CO}_2$  was modeled as a rigid linear triatomic molecule with three charged

LJ interaction sites, for which the LJ potential parameters for O atom ( $q = -0.35e$ ) and C atom ( $q = +0.70e$ ) in CO<sub>2</sub> molecule with C-O bond length  $l = 0.116$  nm were taken from the TraPPE force field.<sup>33</sup> The partial charges on the atoms of C<sub>2</sub>H<sub>2</sub> molecule was taken from the literature ( $q_C = -0.266e$  and  $q_H = +0.266e$ ), and the LJ potential parameters for C<sub>2</sub>H<sub>2</sub> was taken from the Optimized Potentials for Liquid Simulations-All Atom (OPLS-AA) force field.<sup>34</sup> A cutoff distance of 15.4 Å was used for LJ interactions, and the Coulombic interactions were calculated by using Ewald summation. For each run, the  $5 \times 10^6$  equilibration steps,  $5 \times 10^6$  production steps were employed.

The binding energy was calculated by DFT method using the Dmol<sup>3</sup> module. The calculations were performed under the generalized gradient approximation (GGA) with the Perdew-Burke-Ernzerhof (PBE) exchange-correlation functional and the double numerical plus d-functions (DND) basis set. A cutoff of 4.5 Å was used and the SCF convergence was set to  $10^{-5}$ . The binding energy of gas is evaluated by the following equation:  $E_{\text{bind}} = E_{\text{framework+gas}} - E_{\text{framework}} - E_{\text{gas}}$ , in which  $E_{\text{framework+gas}}$  is the total energy of the framework and the adsorbed gas molecule,  $E_{\text{framework}}$  and  $E_{\text{gas}}$  are the energies of the framework and gas molecule.

## References:

- 1 W. Yang, A. J. Davies, X. Lin, M. Suyetin, R. Matsuda, A. J. Blake, C. Wilson, W. Lewis, J. E. Parker, C. C. Tang, M. W. George, P. Hubberstey, S. Kitagawa, H. Sakamoto, E. Bichoutskaia, N. R. Champness, S. Yang and M. Schröder, Selective CO<sub>2</sub> uptake and inverse CO<sub>2</sub>/C<sub>2</sub>H<sub>2</sub> selectivity in a dynamic bifunctional metal-organic framework, *Chem. Sci.*, 2012, **3**, 2993-2999.
- 2 M. L. Foo, R. Matsuda, Y. Hijikata, R. Krishna, H. Sato, S. Horike, A. Hori, J. Duan, Y. Sato, Y. Kubota, M. Takata and S. Kitagawa, An adsorbate discriminatory gate effect in a flexible porous coordination polymer for selective adsorption of CO<sub>2</sub> over C<sub>2</sub>H<sub>2</sub>, *J. Am. Chem. Soc.*, 2016, **138**, 3022–3030.
- 3 K.-J. Chen, H. S. Scott, D. G. Madden, T. Pham, A. Kumar, A. Bajpai, M. Lusi, K. A. Forrest, B. Space, J. J. Perry and M. J. Zaworotko, Benchmark C<sub>2</sub>H<sub>2</sub>/CO<sub>2</sub> and

- CO<sub>2</sub>/C<sub>2</sub>H<sub>2</sub> separation by two closely related hybrid ultramicroporous materials, *Chem*, 2016, **1**, 753–765.
- 4 L. Li, J. Wang, Z. Zhang, Q. Yang, Y. Yang, B. Su, Z. Bao and Q. Ren, Inverse adsorption separation of CO<sub>2</sub>/C<sub>2</sub>H<sub>2</sub> mixture in cyclodextrin-based metal–organic frameworks, *ACS Appl. Mater. Interfaces*, 2019, **11**, 2543–2550.
  - 5 D. Ma, Z. Li, J. Zhu, Y. Zhou, L. Chen, X. Mai, M. Liufu, Y. Wu and Y. Li, Inverse and highly selective separation of CO<sub>2</sub>/C<sub>2</sub>H<sub>2</sub> on a thulium–organic framework, *J. Mater. Chem. A*, 2020, **8**, 11933-11937.
  - 6 O. T. Qazvini, R. Babarao and S. G. Telfer, Selective capture of carbon dioxide from hydrocarbons using a metal-organic framework, *Nat. Commun.*, 2021, **12**, 197.
  - 7 Y. Xie, H. Cui, H. Wu, R.-B. Lin, W. Zhou and B. Chen, Electrostatically driven selective adsorption of carbon dioxide over acetylene in an ultramicroporous material, *Angew. Chem. Int. Ed.*, 2021, **60**, 9604-9609.
  - 8 Y. Gu, J.-J. Zheng, K. Otake, M. Shivanna, S. Sakaki, H. Yoshino, M. Ohba, S. Kawaguchi, Y. Wang, F. Li and S. Kitagawa, Host–guest interaction modulation in porous coordination polymers for inverse selective CO<sub>2</sub>/C<sub>2</sub>H<sub>2</sub> separation, *Angew. Chem. Int. Ed.*, 2021, **60**, 11688-11694.
  - 9 Z. Zhang, S. B. Peh, R. Krishna, C. Kang, K. Chai, Y. Wang, D. Shi and D. Zhao, Optimal pore chemistry in an ultramicroporous metal–organic framework for benchmark inverse CO<sub>2</sub>/C<sub>2</sub>H<sub>2</sub> separation, *Angew. Chem. Int. Ed.*, 2021, **60**, 17198-17204.
  - 10 L.-Z. Cai, Z.-Z. Yao, S.-J. Lin, M.-S. Wang and G.-C. Guo, Photoinduced electron-transfer (PIET) strategy for selective adsorption of CO<sub>2</sub> over C<sub>2</sub>H<sub>2</sub> in a MOF, *Angew. Chem. Int. Ed.*, 2021, **60**, 18223-18230.
  - 11 X.-Y. Li, Y. Song, C.-X. Zhang, C.-X. Zhao and C. He, Inverse CO<sub>2</sub>/C<sub>2</sub>H<sub>2</sub> separation in a pillared-layer framework featuring a chlorine-modified channel by quadrupole-moment sieving, *Sep. Purif. Technol.*, 2021, **279**, 119608.
  - 12 Y. Shi, Y. Xie, H. Cui, Y. Ye, H. Wu, W. Zhou, H. Arman, R.-B. Lin and B. Chen, Highly selective adsorption of carbon dioxide over acetylene in an

- ultramicroporous metal–organic framework, *Adv. Mater.*, 2021, **33**, 2105880.
- 13 H. Cui, Y. Xie, Y. Ye, Y. Shi, B. Liang and B. Chen, An ultramicroporous metal–organic framework with record high selectivity for inverse CO<sub>2</sub>/C<sub>2</sub>H<sub>2</sub> separation, *B. Chem. Soc. Jpn.*, 2021, **94**, 2698–2701.
  - 14 C. Hao, H. Ren, H. Zhu, Y. Chi, W. Zhao, X. Liu and W. Guo, CO<sub>2</sub>-favored metal–organic frameworks SU-101(M) (M = Bi, In, Ga, and Al) with inverse and high selectivity of CO<sub>2</sub> from C<sub>2</sub>H<sub>2</sub> and C<sub>2</sub>H<sub>4</sub>, *Sep. Purif. Technol.*, 2022, **290**, 120804.
  - 15 L.-N. Ma, G.-D. Wang, L. Hou, Z. Zhu and Y.-Y. Wang, Efficient one-step purification of C<sub>1</sub> and C<sub>2</sub> hydrocarbons over CO<sub>2</sub> in a new CO<sub>2</sub>-selective MOF with a gate-opening effect, *ACS Appl. Mater. Interfaces*, 2022, **14**, 26858–26865.
  - 16 J. Cui, Z. Qiu, L. Yang, Z. Zhang, X. Cui and H. Xing, Kinetic-sieving of carbon dioxide from acetylene through a novel sulfonic ultramicroporous material, *Angew. Chem. Int. Ed.*, 2022, **134**, e202208756.
  - 17 C. He, P. Zhang, Y. Wang, Y. Zhang, T. Hu, L. Li and J. Li, Thermodynamic and kinetic synergetic separation of CO<sub>2</sub>/C<sub>2</sub>H<sub>2</sub> in an ultramicroporous metal-organic framework, *Sep. Purif. Technol.*, 2023, **304**, 122318.
  - 18 J. Yu, J. Zhang, P. Zhang, Y. Wang, S.-N. Li and Q.-G. Zhai, Controllable inverse C<sub>2</sub>H<sub>2</sub>/CO<sub>2</sub> separation in ultra-stable Zn-organic frameworks for efficient removal of trace CO<sub>2</sub> from acetylene, *J. Mater. Chem. A*, 2022, **10**, 23630-23638.
  - 19 H. Zhu, W. Xue, H. Huang, L. Chen, H. Liu and C. Zhong, Water boosted CO<sub>2</sub>/C<sub>2</sub>H<sub>2</sub> separation in L-arginine functionalized metal-organic framework, *Nano Res.*, 2023, **16**, 6113–6119.
  - 20 C. Hao, Z. Ge, R. Krishna, H. Ren, H. Zhu, Y. Chi, W. Zhao, X. Liu and W. Guo, Fine-tuning channel structure and surface chemistry of stable bismuth-organic frameworks for efficient C<sub>2</sub>H<sub>4</sub> purification through reversely trapping CO<sub>2</sub> and C<sub>2</sub>H<sub>2</sub>, *Chem. Eng. J.*, 2023, **471**, 144533.
  - 21 J. Yang, M. Tong, G. Han, M. Chang, T. Yan, Y. Ying, Q. Yang and D. Liu, Solubility-boosted molecular sieving-based separation for purification of acetylene in core–shell IL@MOF composites, *Adv. Funct. Mater.*, 2023, **33**, 2213743.
  - 22 M. Cavallo, C. Atzori, M. Signorile, F. Costantino, D. M. Venturi, A. Koutsianos,

- K. A. Lomachenko, L. Calucci, F. Martini, A. Giovanelli, M. Geppi, V. Crocellà and M. Taddei, Cooperative CO<sub>2</sub> adsorption mechanism in a perfluorinated Ce<sup>IV</sup>-based metal organic framework, *J. Mater. Chem. A*, 2023, **11**, 5568-5583.
- 23 Q. Liu, S. G. Cho, J. Hilliard, T.-Y. Wang, S.-C. Chien, L.-C. Lin, A. C. Co and C. R. Wade, Inverse CO<sub>2</sub>/C<sub>2</sub>H<sub>2</sub> separation with MFU-4 and selectivity reversal via postsynthetic ligand exchange, *Angew. Chem. Int. Ed.*, 2023, **62**, e202218854.
- 24 W. Wang, G.-D. Wang, B. Zhang, X.-Y. Li, L. Hou, Q.-Y. Yang and B. Liu, Discriminatory gate-opening effect in a flexible metal–organic framework for inverse CO<sub>2</sub>/C<sub>2</sub>H<sub>2</sub> separation, *Small*, 2023, **19**, 2302975.
- 25 Z. Zhang, Z. Deng, H. A. Evans, D. Mullangi, C. Kang, S. B. Peh, Y. Wang, C. M. Brown, J. Wang, P. Canepa, A. K. Cheetham and D. Zhao, Exclusive recognition of CO<sub>2</sub> from hydrocarbons by aluminum formate with hydrogen-confined pore cavities, *J. Am. Chem. Soc.*, 2023, **145**, 11643–11649.
- 26 S. Geng, H. Xu, C.-S. Cao, T. Pham, B. Zhao and Z. Zhang, Bioinspired design of a giant [Mn<sub>86</sub>] nanocage-based metal-organic framework with specific CO<sub>2</sub> binding pockets for highly selective CO<sub>2</sub> separation, *Angew. Chem. Int. Ed.*, 2023, **62**, e202305390.
- 27 S.-Q. Yang, R. Krishna, H. Chen, L. Li, L. Zhou, Y.-F. An, F.-Y. Zhang, Q. Zhang, Y.-H. Zhang, W. Li, T.-L. Hu and X.-H. Bu, Immobilization of the polar group into an ultramicroporous metal–organic framework enabling benchmark inverse selective CO<sub>2</sub>/C<sub>2</sub>H<sub>2</sub> separation with record C<sub>2</sub>H<sub>2</sub> production, *J. Am. Chem. Soc.*, 2023, **145**, 13901–13911.
- 28 Z. Zhang, Y. Chen, K. Chai, C. Kang, S. B. Peh, H. Li, J. Ren, X. Shi, X. Han, C. Dejoie, S. J. Day, S. Yang and D. Zhao, Temperature-dependent rearrangement of gas molecules in ultramicroporous materials for tunable adsorption of CO<sub>2</sub> and C<sub>2</sub>H<sub>2</sub>, *Nat. Commun.*, 2023, **14**, 3789.
- 29 Y. Li, X. Wang, H. Zhang, L. He, J. Huang, W. Wei, Z. Yuan, Z. Xiong, H. Chen, S. Xiang, B. Chen and Z. Zhang, A microporous hydrogen bonded organic framework for highly selective separation of carbon dioxide over acetylene, *Angew. Chem. Int. Ed.*, 2023, **62**, e202311419.

- 30 J.-H. Li, Y.-W. Gan, J.-X. Chen, R.-B. Lin, Y. Yang, H. Wu, W. Zhou, B. Chen and X.-M. Chen, Reverse separation of carbon dioxide and acetylene in two isostructural copper pyridine-carboxylate frameworks, *Angew. Chem. Int. Ed.*, 2024, **63**, e202400823.
- 31 A. K. Rappé and W. A. Goddard III, Charge equilibration for molecular dynamics simulations, *J. Phys. Chem.*, 1991, **95**, 3358–3363.
- 32 S. L. Mayo, B. D. Olafson and W. A. Goddard III, DREIDING: a generic force field for molecular simulations, *J. Phys. Chem.*, 1990, **94**, 8897–8909.
- 33 J. J. Potoff and J. I. Siepmann, Vapor–liquid equilibria of mixtures containing alkanes, carbon dioxide, and nitrogen, *AIChE J.*, 2001, **47**, 1676–1682.
- 34 W. L. Jorgensen, D. S. Maxwell and J. Tirado-Rives, Development and testing of the OPLS all-atom force field on conformational energetics and properties of organic liquids, *J. Am. Chem. Soc.*, 1996, **118**, 11225–11236.
